# Supplementary material for: Deletions Rate-Limit Breast and Ovarian Cancer Initiation
Source: PubMed Central journal article supplement — bioRxiv. 2024 Oct 21:2024.10.17.618945. Preprint. [Version 1] doi: 10.1101/2024.10.17.618945 (PMC11526986; doi:10.1101/2024.10.17.618945), 2024-10-21

# Supplementary Figure 1

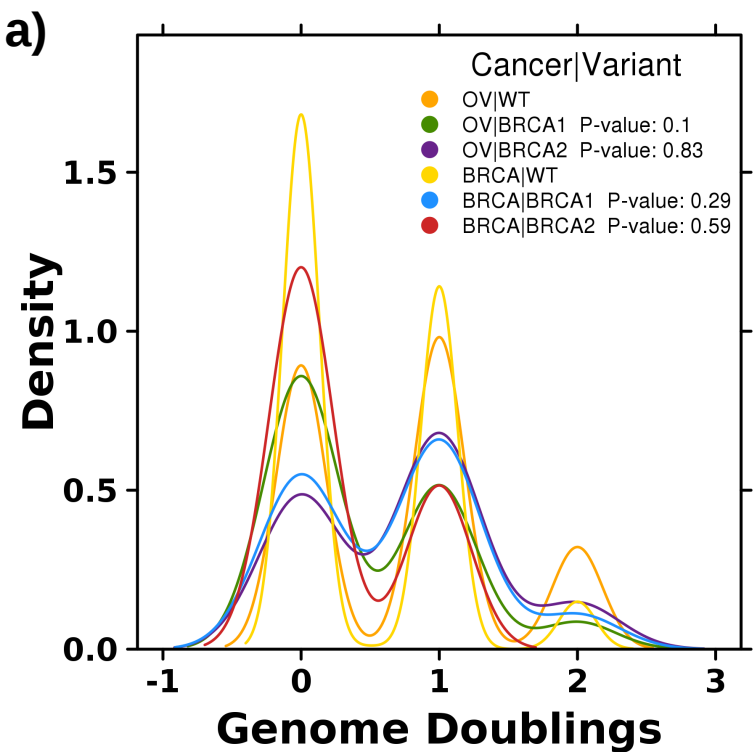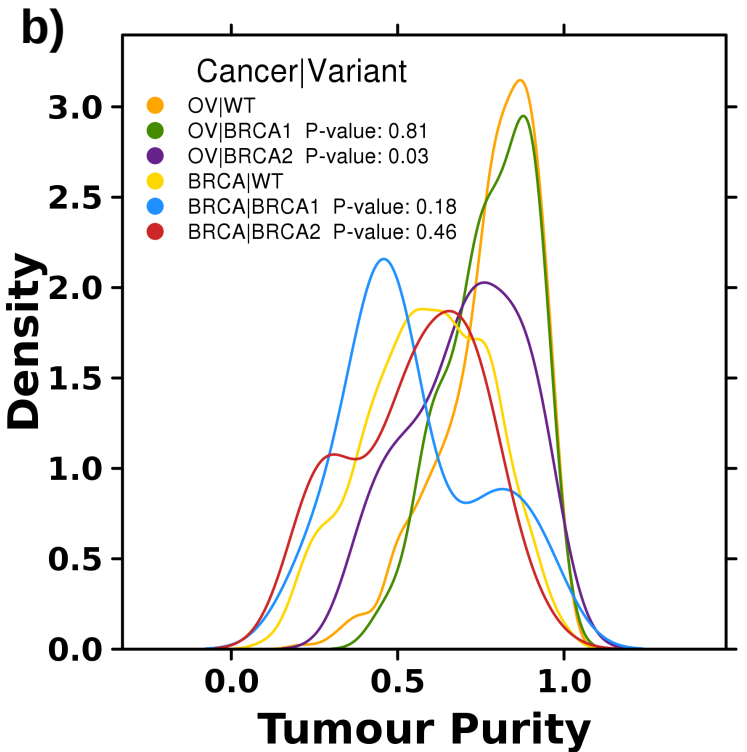

# Supplementary Figure 2

a)

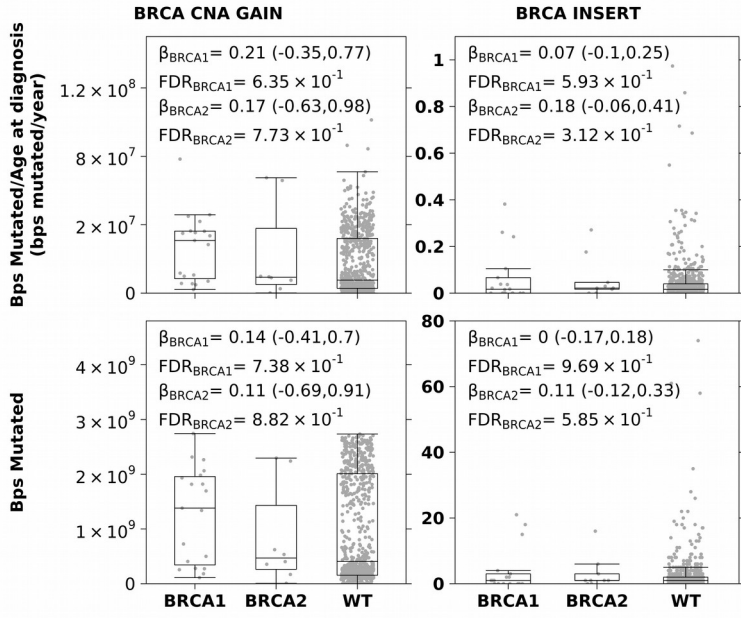

b)

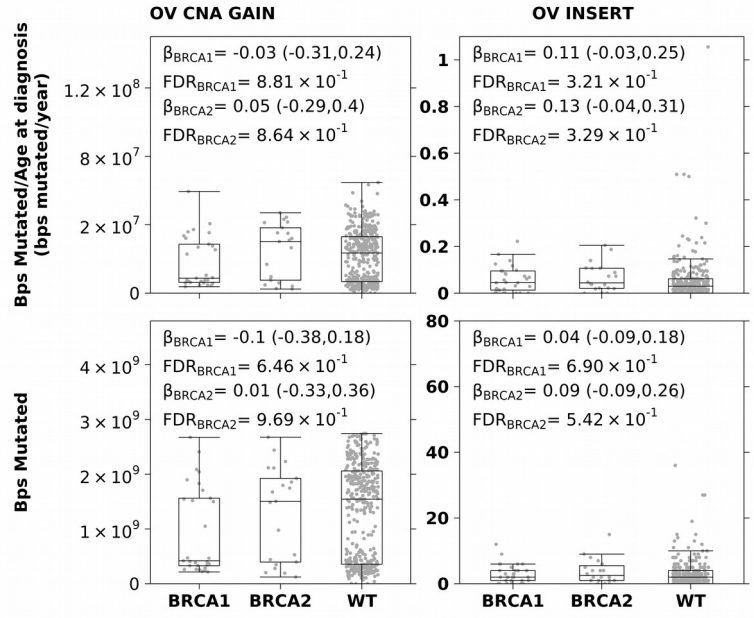

# Supplementary Figure 3

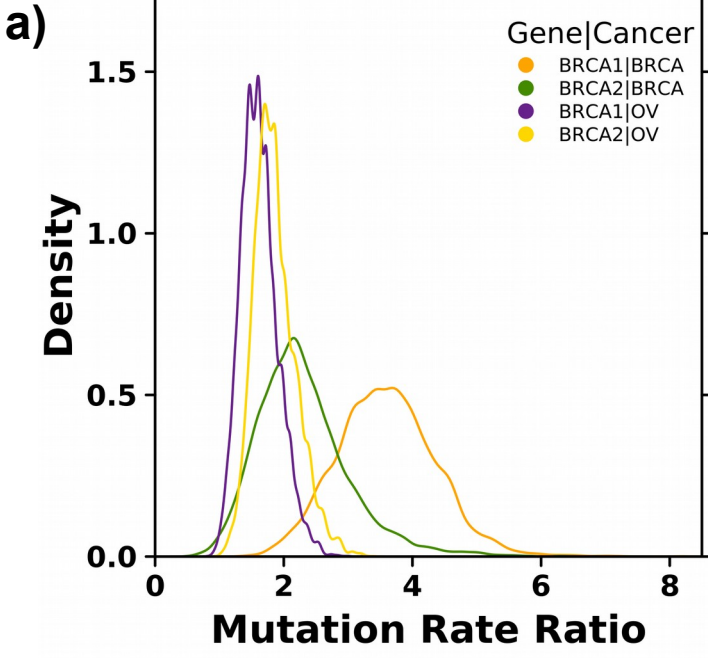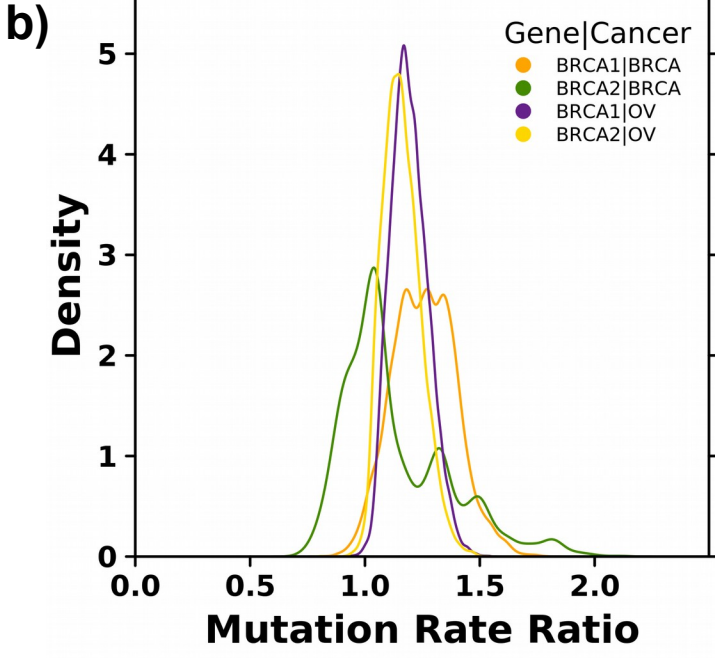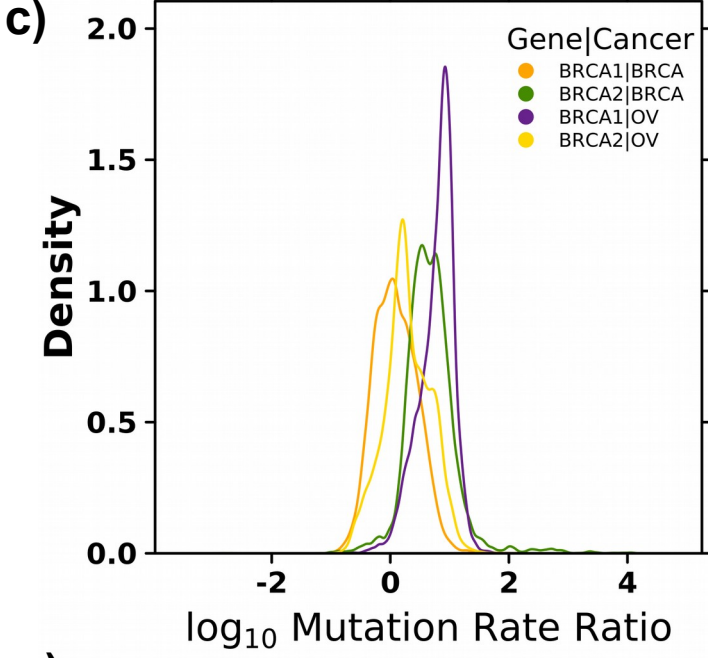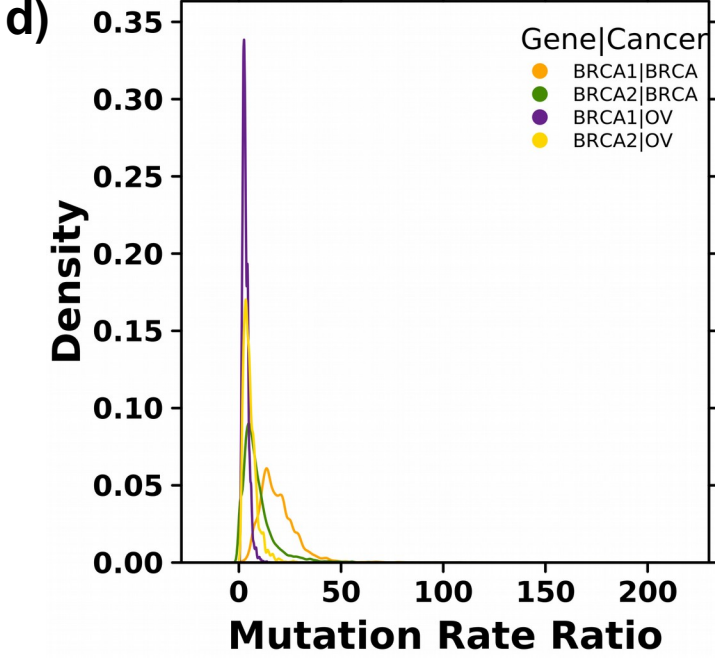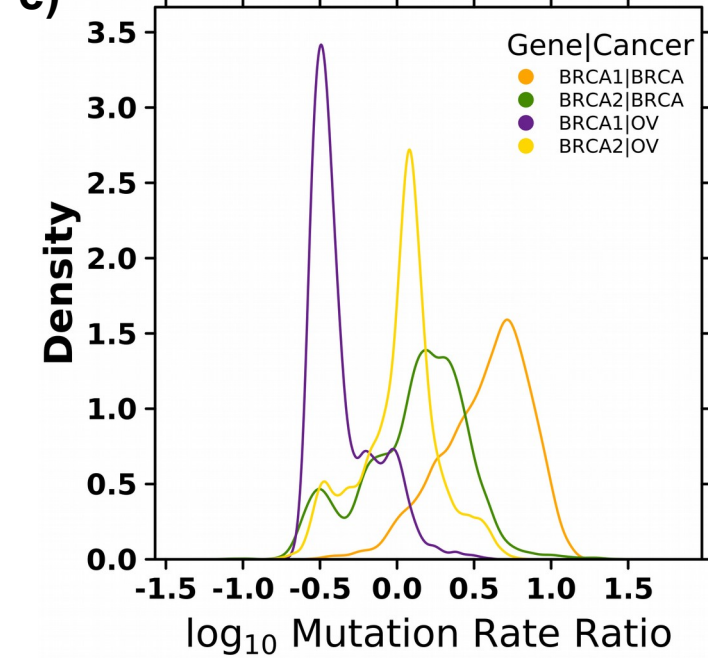

# Supplementary Figure 4

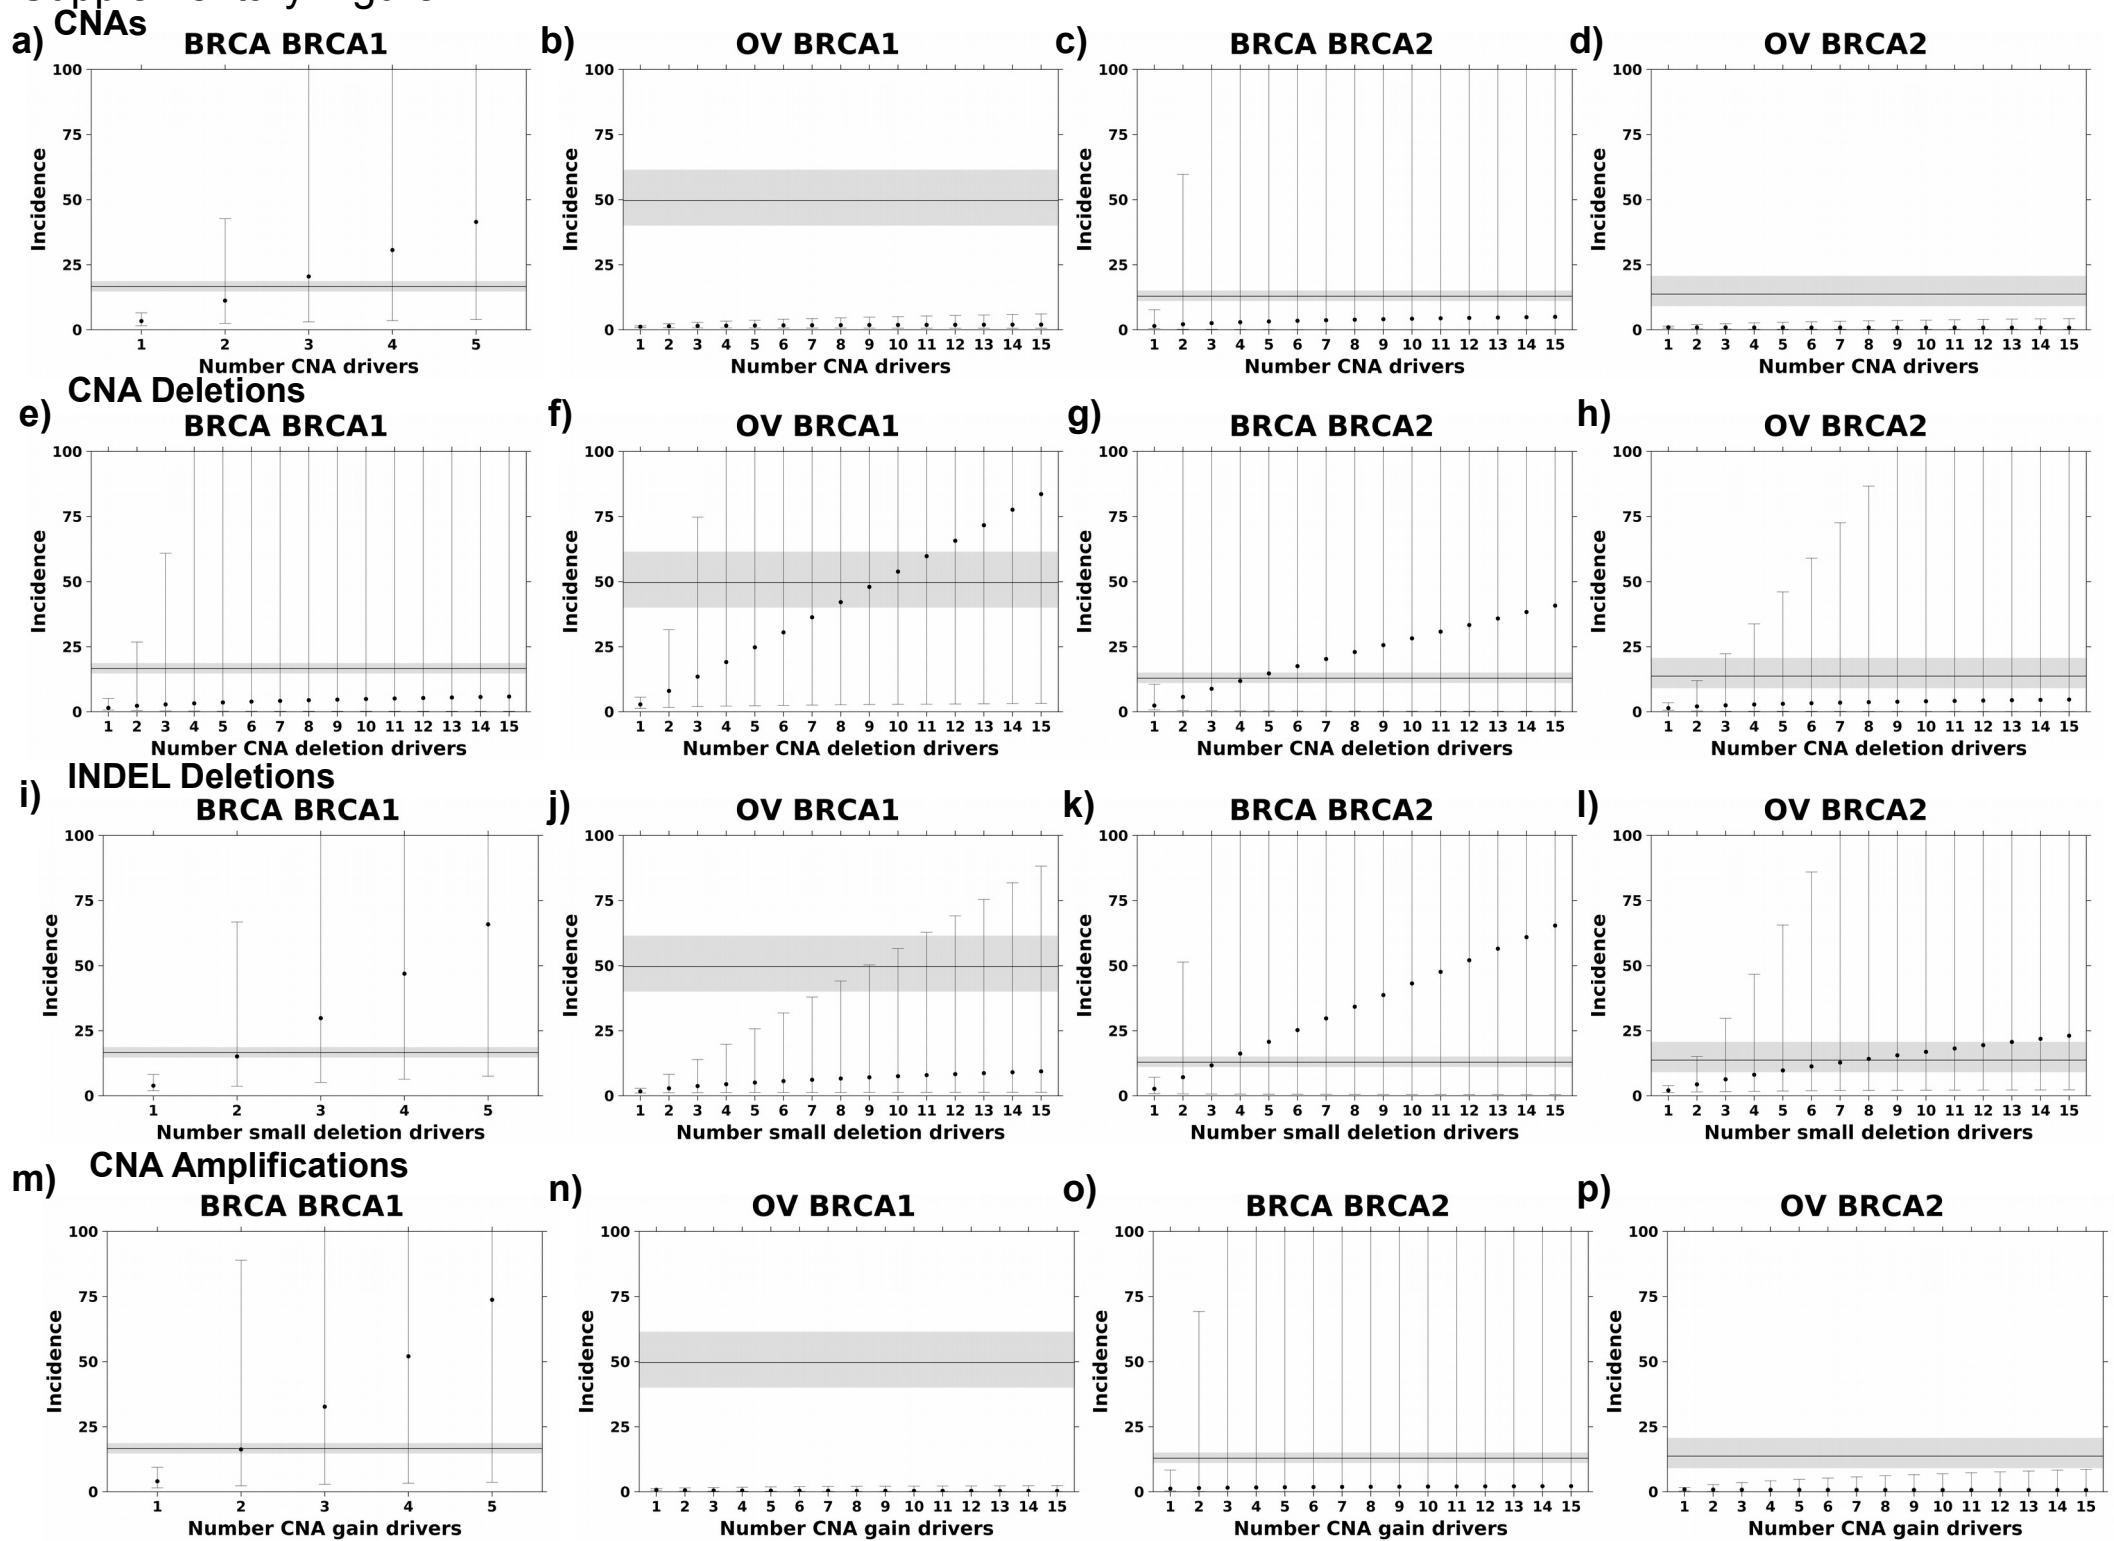

# Supplementary Figure 5

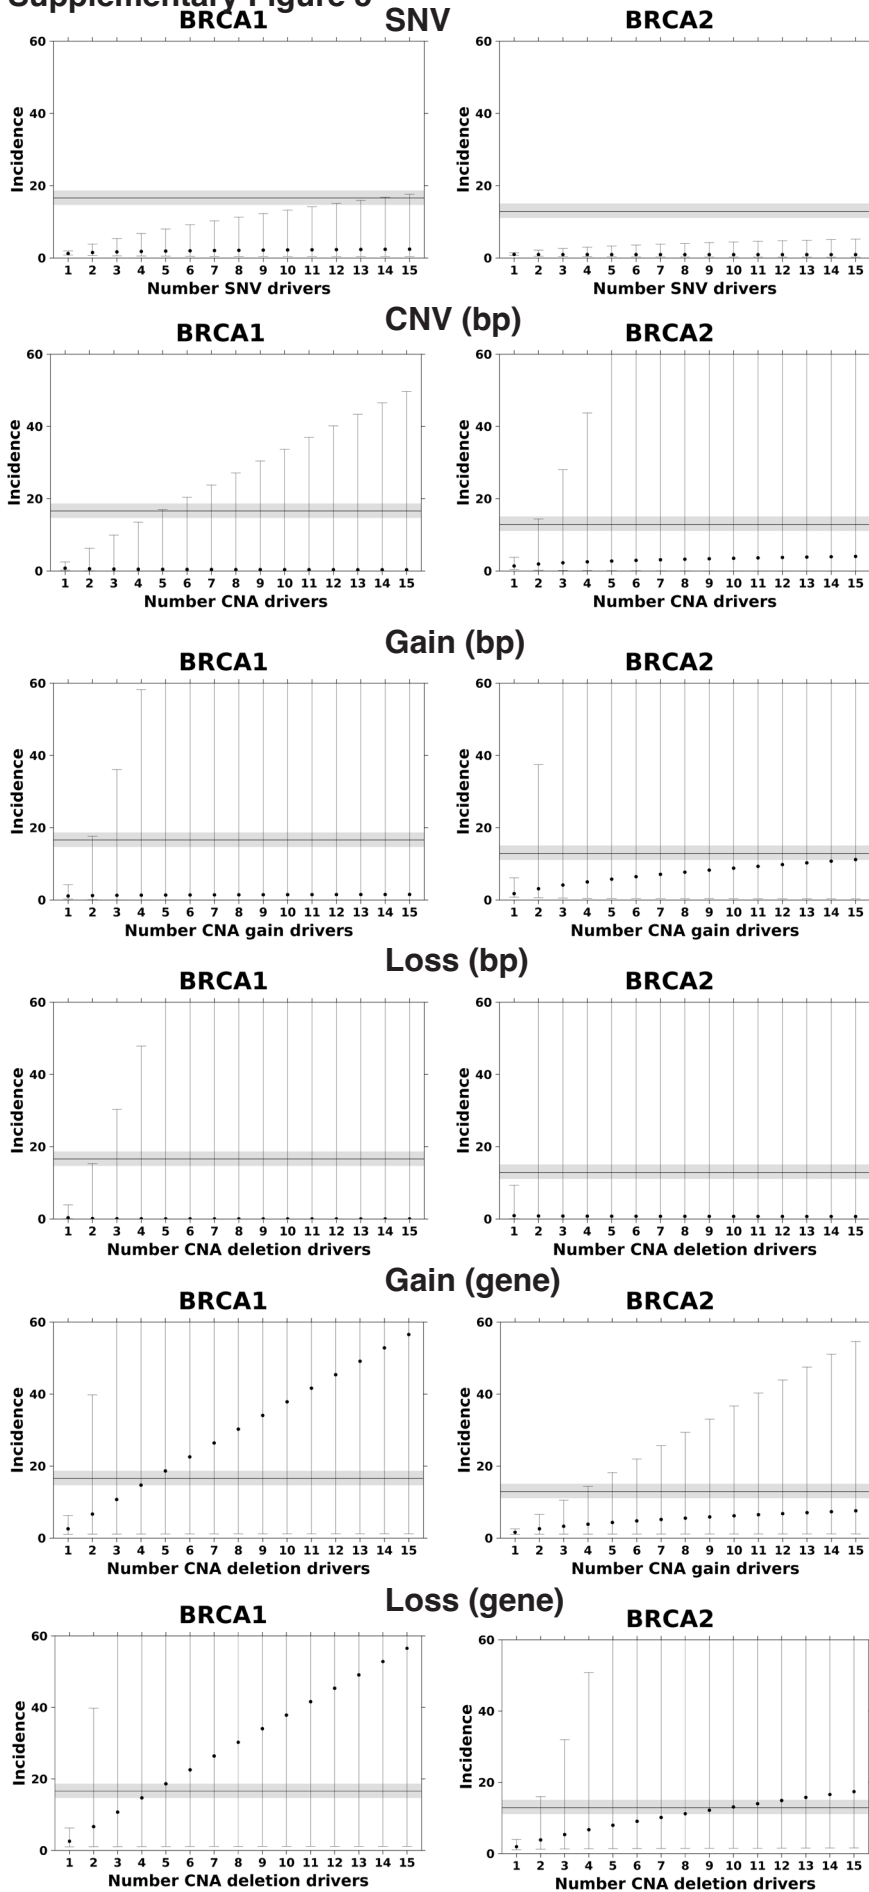

# Supplementary Figure 6

## Breast Cancer

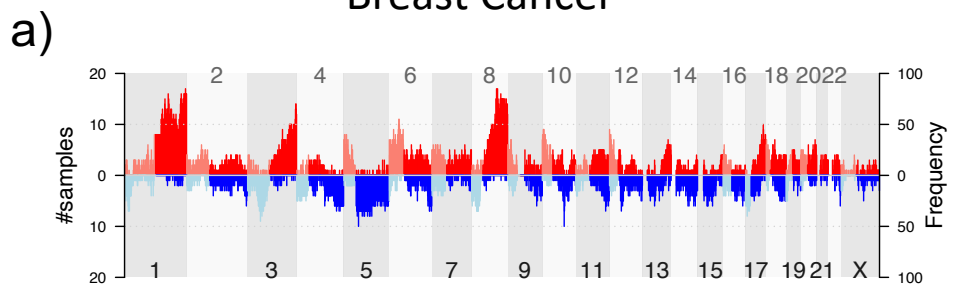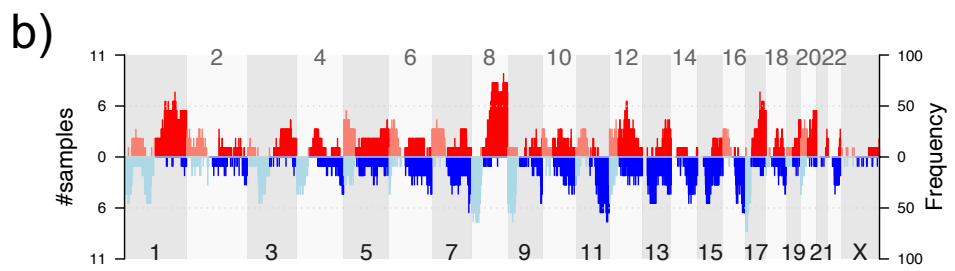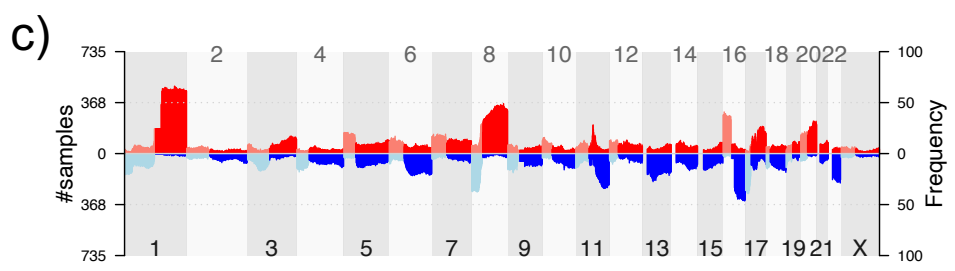

## Ovarian Cancer

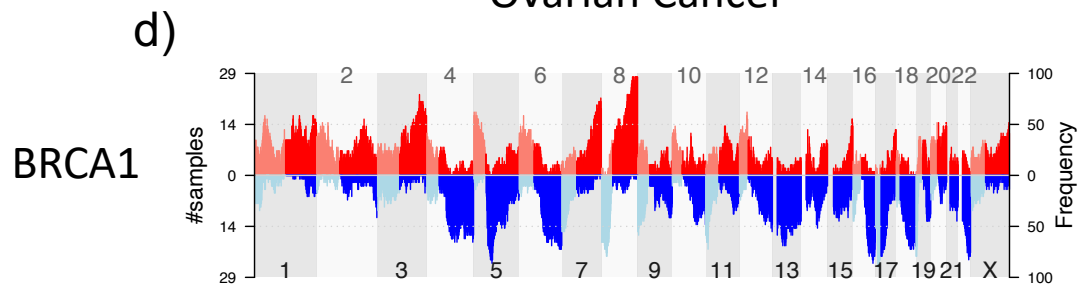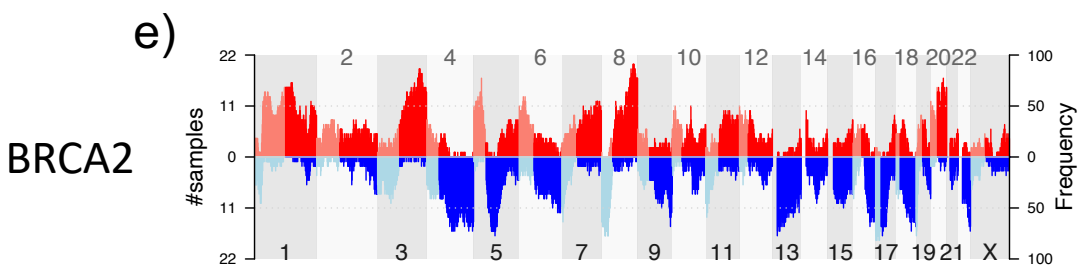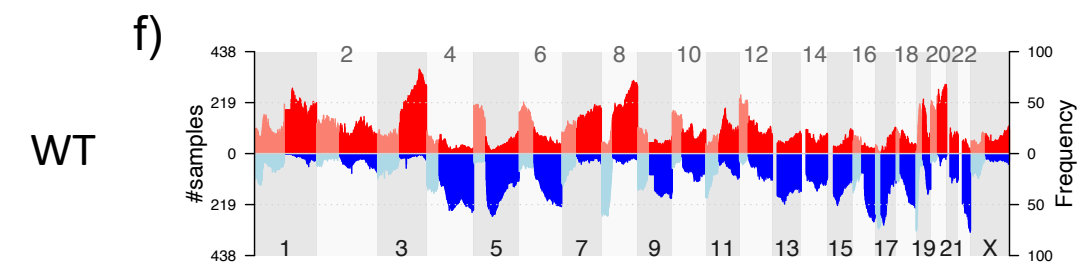

# Supplementary figure 7

a

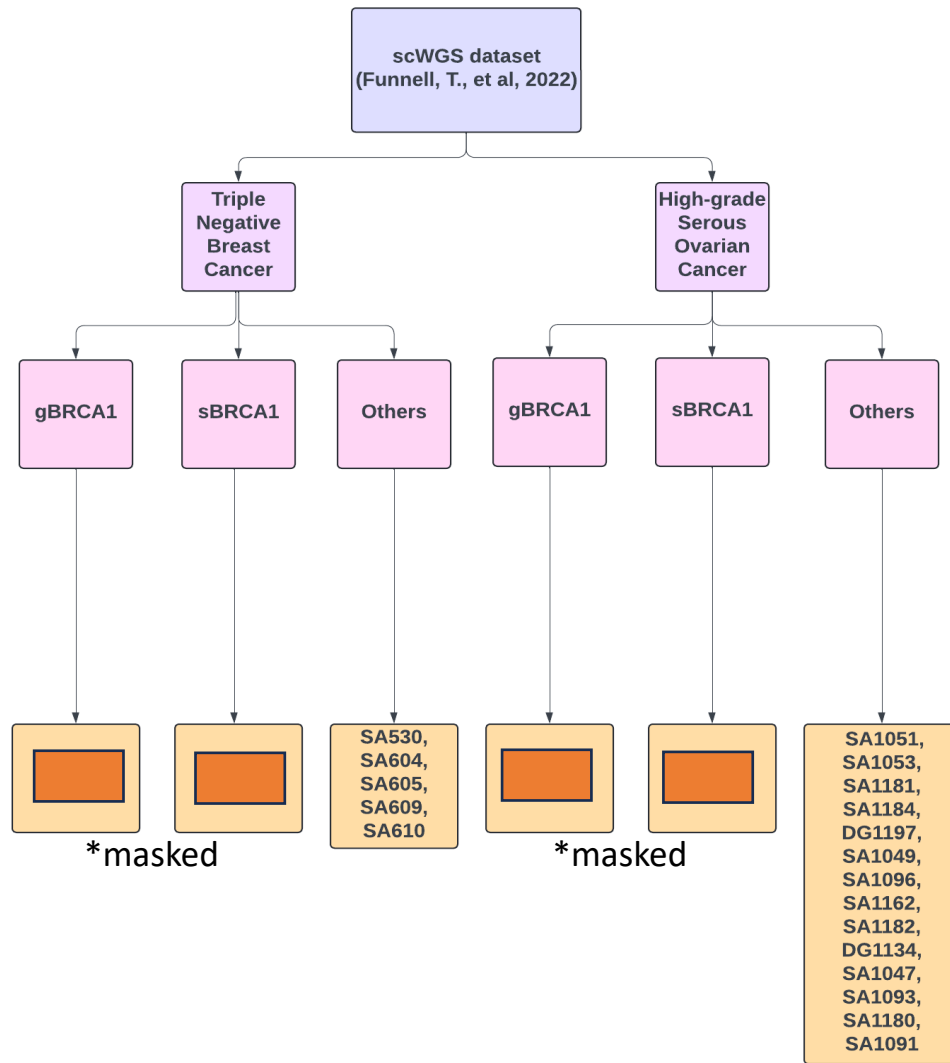

b

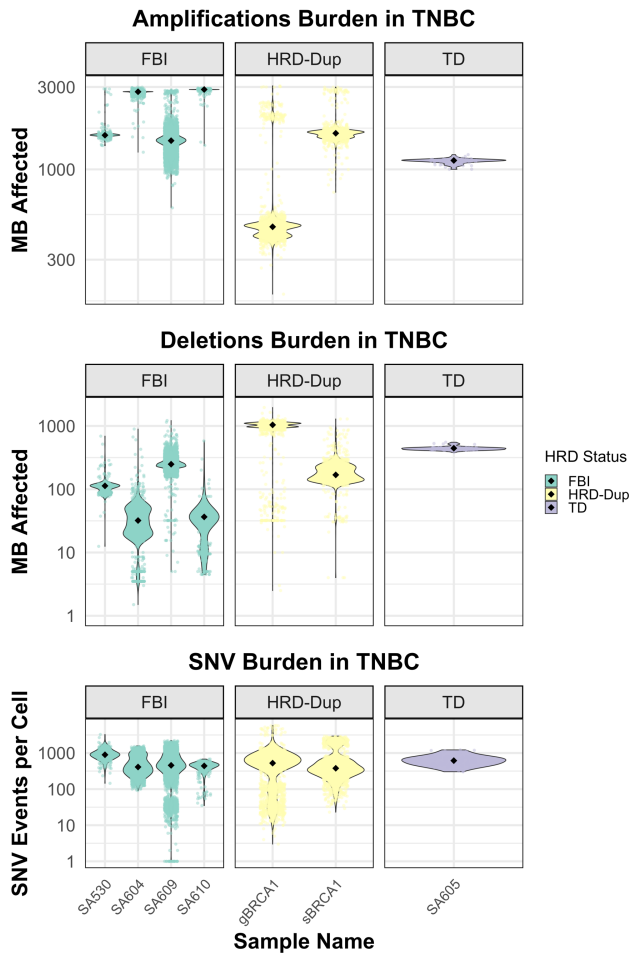

c

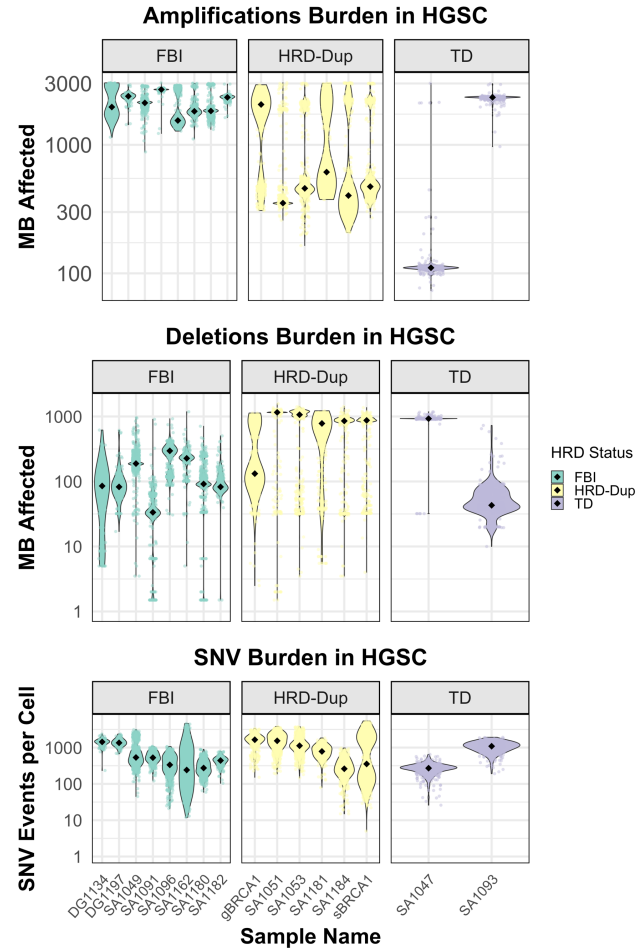

# Supplementary figure 8

a. inferCNV heatmap of BRCA1 TNBC Samples (Normal Epithelial Reference)

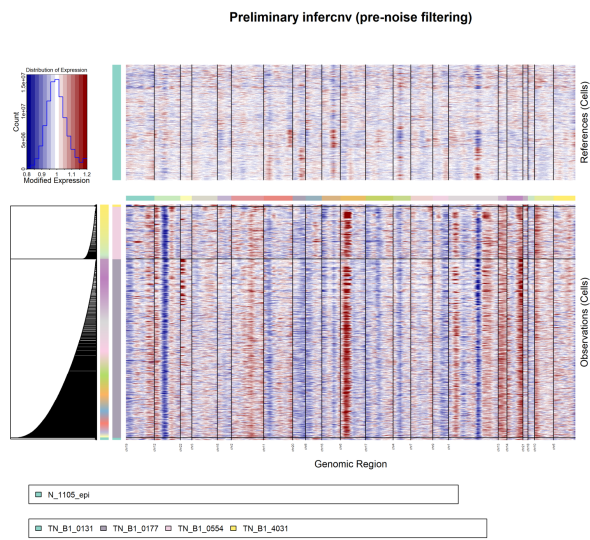

b. inferCNV heatmap of non-BRCA1 TNBC Samples (Normal Epithelial Reference)

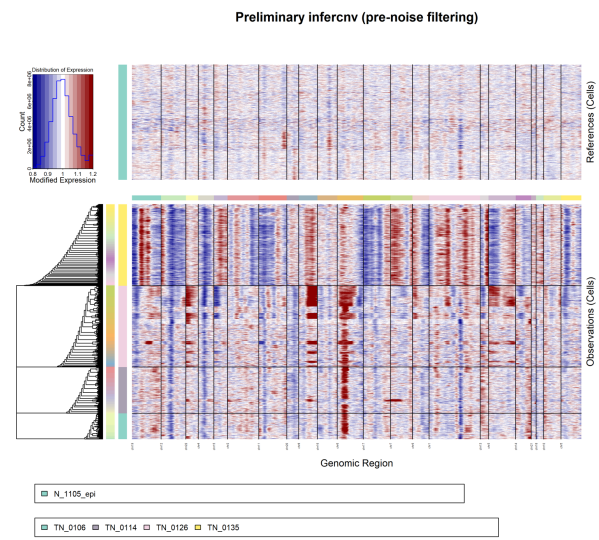

c. inferCNV heatmap of BRCA1+/- Preneoplastic Normal Breast Tissue (Normal Epithelial Reference)

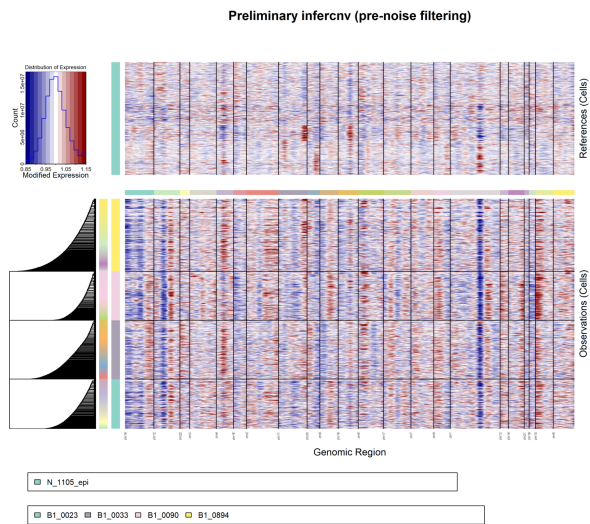

d. inferCNV heatmap of non-BRCA1 Premenopausal Normal Breast Tissue (Normal Epithelial Reference)

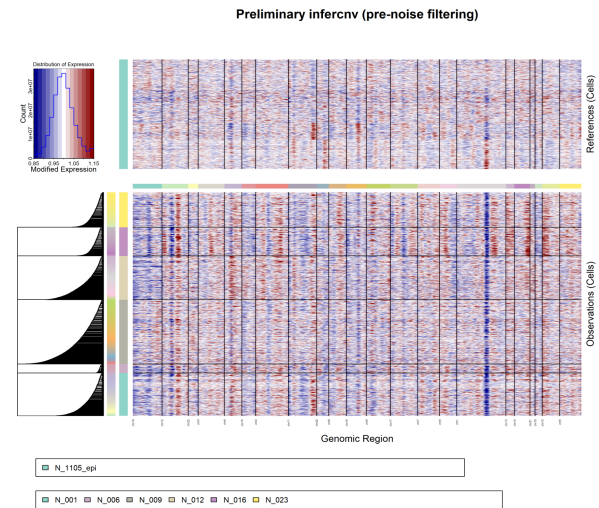



# Supplementary figure 9

a. CND Length of non-BRCA1 TNBCs & non-BRCA1 Premenopausal Normal Breast Tissue

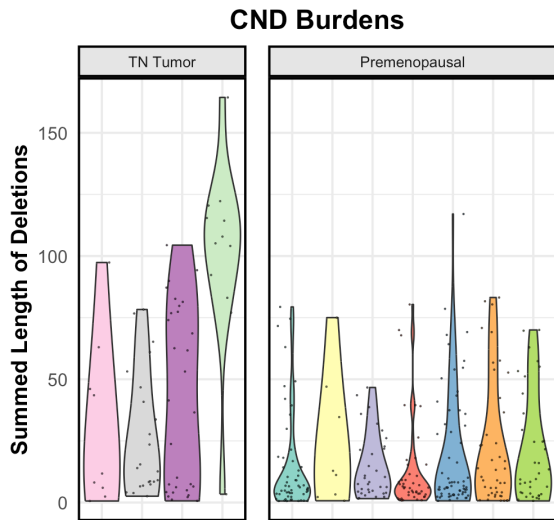

b. CNA Length of non-BRCA1 TNBCs & non-BRCA1 Premenopausal Normal Breast Tissue

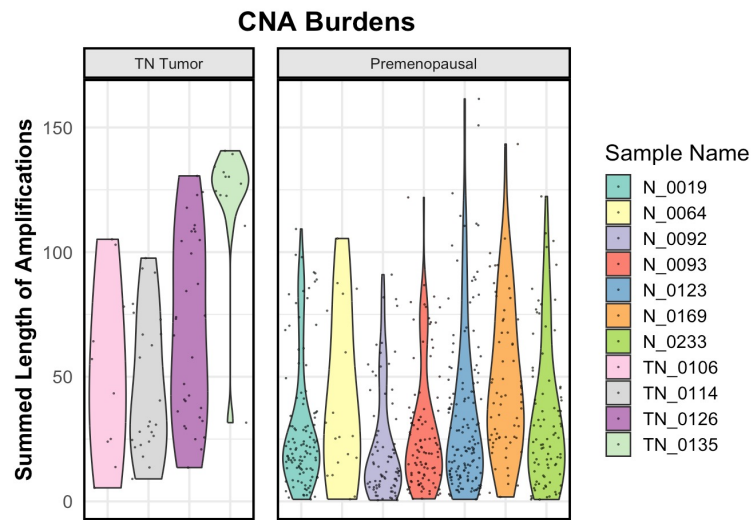

c. CND Length of BRCA1+/- Preneoplastic Normal Breast Tissue & non-BRCA1 Premenopausal Normal Breast Tissue

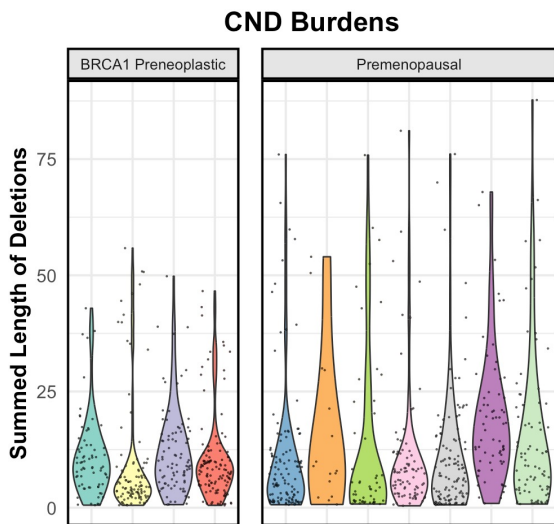

d. CNA Length of BRCA1+/- Preneoplastic Normal Breast Tissue & non-BRCA1 Premenopausal Normal Breast Tissue

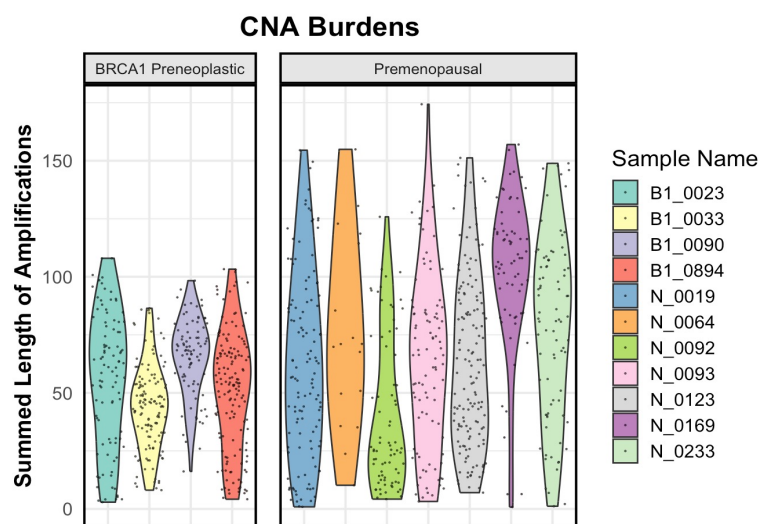

Supplement: media-1.pdf [file media-1.pdf]
